# Supplementary material
Source: MDPI journal article supplement (https://www.mdpi.com/2225-1154/11/5/109)
Supplement: s1 [file s1]

**Table S4.** Increases in developed land and maximum potential for realized social costs of carbon (C) due to complete loss of total soil carbon (TSC) of developed land by soil order and region in New York State (USA) from 2001 to 2016.

| Region                                             | Degree of Weathering and Soil Development                                                                                                                      |                       |                       |                       |                       |                       |                       |
|----------------------------------------------------|----------------------------------------------------------------------------------------------------------------------------------------------------------------|-----------------------|-----------------------|-----------------------|-----------------------|-----------------------|-----------------------|
|                                                    | Slight                                                                                                                                                         |                       |                       | Moderate              |                       | Strong                |                       |
|                                                    | Entisols                                                                                                                                                       | Inceptisols           | Histosols             | Alfisols              | Mollisols             | Spodosols             | Ultisols              |
|                                                    | Developed Area Increase between 2001 and 2016 (km <sup>2</sup> )<br>Midpoint Complete Loss of Total Soil Carbon (kg)<br>Midpoint SC-CO <sub>2</sub> (\$ = USD) |                       |                       |                       |                       |                       |                       |
| <b>Western New York</b>                            | 2.6                                                                                                                                                            | 22.4                  | 0.1                   | 29.9                  | 1.5                   | 0                     | 0.1                   |
| 56.6 km <sup>2</sup> (7.5 × 10 <sup>8</sup> kg C)  | 3.4 × 10 <sup>7</sup>                                                                                                                                          | 3.1 × 10 <sup>8</sup> | 9.6 × 10 <sup>6</sup> | 3.5 × 10 <sup>8</sup> | 3.6 × 10 <sup>7</sup> | 0                     | 5.3 × 10 <sup>5</sup> |
| \$142.7M                                           | \$5.7M                                                                                                                                                         | \$52.9M               | \$1.6M                | \$68.1M               | \$6.1M                | \$0                   | \$89,639.7            |
| <b>Finger Lakes</b>                                | 5.6                                                                                                                                                            | 9.5                   | 0.1                   | 40.8                  | 0.1                   | 0                     | 0                     |
| 56.1 km <sup>2</sup> (7.0 × 10 <sup>8</sup> kg C)  | 7.1 × 10 <sup>7</sup>                                                                                                                                          | 1.3 × 10 <sup>8</sup> | 1.7 × 10 <sup>7</sup> | 4.8 × 10 <sup>8</sup> | 3.6 × 10 <sup>6</sup> | 0                     | 0                     |
| \$118.8M                                           | \$12.0M                                                                                                                                                        | \$22.2M               | \$2.9M                | \$81.1M               | \$606,235.7           | \$0                   | \$0                   |
| <b>Southern Tier</b>                               | 1.8                                                                                                                                                            | 10.6                  | 0                     | 4.2                   | 0                     | 0                     | 0                     |
| 16.6 km <sup>2</sup> (2.2 × 10 <sup>8</sup> kg C)  | 2.3 × 10 <sup>7</sup>                                                                                                                                          | 1.5 × 10 <sup>8</sup> | 0                     | 4.8 × 10 <sup>7</sup> | 0                     | 0                     | 0                     |
| \$37.1M                                            | \$3.9M                                                                                                                                                         | \$25.1M               | \$0                   | \$8.1M                | \$0                   | \$0                   | \$0                   |
| <b>Central New York</b>                            | 2.6                                                                                                                                                            | 8.1                   | 0.3                   | 25.5                  | 0.1                   | 0.3                   | 0                     |
| 36.9 km <sup>2</sup> (4.8 × 10 <sup>8</sup> kg C)  | 3.4 × 10 <sup>7</sup>                                                                                                                                          | 1.1 × 10 <sup>8</sup> | 3.1 × 10 <sup>7</sup> | 3.0 × 10 <sup>8</sup> | 2.9 × 10 <sup>6</sup> | 3.9 × 10 <sup>6</sup> | 0                     |
| \$81.7M                                            | \$5.7M                                                                                                                                                         | \$19.0M               | \$5.2M                | \$50.7M               | \$496,358.9           | \$652,299.5           | \$0                   |
| <b>North Country</b>                               | 6.6                                                                                                                                                            | 8.9                   | 0                     | 6.5                   | 1.0                   | 5.9                   | 0                     |
| 28.9 km <sup>2</sup> (3.8 × 10 <sup>8</sup> kg C)  | 8.4 × 10 <sup>7</sup>                                                                                                                                          | 1.3 × 10 <sup>8</sup> | 0                     | 7.6 × 10 <sup>7</sup> | 2.3 × 10 <sup>7</sup> | 7.5 × 10 <sup>7</sup> | 0                     |
| \$64.8M                                            | \$14.1M                                                                                                                                                        | \$21.2M               | \$0                   | \$12.9M               | \$3.8M                | \$12.8M               | \$0                   |
| <b>Mohawk Valley</b>                               | 2.9                                                                                                                                                            | 6.9                   | 0                     | 6.1                   | 0.2                   | 0.2                   | 0                     |
| 16.3 km <sup>2</sup> (2.1 × 10 <sup>8</sup> kg C)  | 3.7 × 10 <sup>7</sup>                                                                                                                                          | 9.6 × 10 <sup>7</sup> | 0                     | 7.2 × 10 <sup>7</sup> | 2.5 × 10 <sup>6</sup> | 3.3 × 10 <sup>6</sup> | 0                     |
| \$35.5M                                            | \$6.2M                                                                                                                                                         | \$16.2M               | \$0                   | \$12.1M               | \$416,789.2           | \$554,872.5           | \$0                   |
| <b>Capital District</b>                            | 36.6                                                                                                                                                           | 31.7                  | 0                     | 19.1                  | 0.5                   | 0.2                   | 0                     |
| 88.1 km <sup>2</sup> (1.1 × 10 <sup>9</sup> kg C)  | 4.7 × 10 <sup>8</sup>                                                                                                                                          | 4.4 × 10 <sup>8</sup> | 0                     | 2.3 × 10 <sup>8</sup> | 1.2 × 10 <sup>7</sup> | 1.7 × 10 <sup>6</sup> | 0                     |
| \$194.3M                                           | \$79.3M                                                                                                                                                        | \$74.4M               | \$0                   | \$37.9M               | \$2.1M                | \$449,189.9           | \$0                   |
| <b>Hudson Valley</b>                               | 10.5                                                                                                                                                           | 125.5                 | 0.4                   | 2.4                   | 0.1                   | 0                     | 0                     |
| 138.9 km <sup>2</sup> (2.0 × 10 <sup>9</sup> kg C) | 1.3 × 10 <sup>8</sup>                                                                                                                                          | 1.8 × 10 <sup>9</sup> | 4.3 × 10 <sup>7</sup> | 2.8 × 10 <sup>7</sup> | 2.6 × 10 <sup>6</sup> | 0                     | 0                     |
| \$331.3M                                           | \$22.7M                                                                                                                                                        | \$296.3M              | \$7.2M                | \$4.7M                | \$435,735.0           | \$0                   | \$0                   |
| <b>New York City</b>                               | 3.0                                                                                                                                                            | 9.2                   | 0                     | 0.3                   | 0                     | 0                     | 0                     |
| 12.5 km <sup>2</sup> (1.7 × 10 <sup>8</sup> kg C)  | 3.8 × 10 <sup>8</sup>                                                                                                                                          | 1.3 × 10 <sup>8</sup> | 0                     | 3.5 × 10 <sup>6</sup> | 0                     | 0                     | 0                     |
| \$54.4M                                            | \$6.5M                                                                                                                                                         | \$47.3M               | \$0                   | \$597,000.0           | \$0                   | \$0                   | \$0                   |
| <b>Long Island</b>                                 | 18.5                                                                                                                                                           | 29.5                  | 0.2                   | 0                     | 0                     | 0.2                   | 0                     |
| 48.4 km <sup>2</sup> (6.8 × 10 <sup>8</sup> kg C)  | 2.4 × 10 <sup>8</sup>                                                                                                                                          | 4.1 × 10 <sup>8</sup> | 2.9 × 10 <sup>7</sup> | 0                     | 0                     | 2.6 × 10 <sup>6</sup> | 0                     |
| \$114.9M                                           | \$40.2M                                                                                                                                                        | \$69.5M               | \$4.8M                | \$0                   | \$0                   | \$434,000.0           | \$0                   |
| <b>Totals</b>                                      | 90.6                                                                                                                                                           | 262.2                 | 1.3                   | 134.8                 | 3.5                   | 6.7                   | 0.1                   |
| 499.2 km <sup>2</sup> (6.7 × 10 <sup>9</sup> kg C) | 1.2 × 10 <sup>9</sup>                                                                                                                                          | 3.7 × 10 <sup>9</sup> | 1.3 × 10 <sup>8</sup> | 1.6 × 10 <sup>9</sup> | 8.3 × 10 <sup>7</sup> | 8.8 × 10 <sup>7</sup> | 5.3 × 10 <sup>5</sup> |
| \$1.1B                                             | \$196.4M                                                                                                                                                       | \$644.1M              | \$29.7M               | \$276.5M              | \$13.9M               | \$14.9M               | \$89,639.7            |

Note: Entisols, Inceptisols, Alfisols, Mollisols, Spodosols, and Ultisols are mineral soils. Histosols are mostly organic soils.
