# Supplementary material
Source: MDPI journal article supplement (https://www.mdpi.com/2225-1154/11/5/109)
Supplement: s1 [file s1]

**Table S1.** Distribution of soil carbon regulating ecosystem services in the state of New York (USA) by soil order.

| Parameter                               | 2016 Total           | Degree of Weathering and Soil Development |                      |                      |                      |                      |                      |                   |
|-----------------------------------------|----------------------|-------------------------------------------|----------------------|----------------------|----------------------|----------------------|----------------------|-------------------|
|                                         |                      | Slight                                    |                      |                      | Moderate             |                      | Strong               |                   |
|                                         |                      | Entisols                                  | Inceptisols          | Histosols            | Alfisols             | Mollisols            | Spodosols            | Ultisols          |
| <b>2016 Area (km<sup>2</sup>)</b>       | 120,649.8            | 7307.3                                    | 65,119.8             | 3529.9               | 20,648.1             | 871.6                | 22,584.7             | 588.5             |
| <b>Soil organic carbon (SOC):</b>       |                      |                                           |                      |                      |                      |                      |                      |                   |
| Minimum (kg)                            | $5.4 \times 10^{11}$ | $1.3 \times 10^{10}$                      | $1.8 \times 10^{11}$ | $2.3 \times 10^{11}$ | $4.7 \times 10^{10}$ | $5.1 \times 10^9$    | $6.5 \times 10^{10}$ | $1.1 \times 10^9$ |
| Midpoint (kg)                           | $1.6 \times 10^{12}$ | $5.8 \times 10^{10}$                      | $5.8 \times 10^{11}$ | $4.9 \times 10^{11}$ | $1.5 \times 10^{11}$ | $1.2 \times 10^{10}$ | $2.8 \times 10^{11}$ | $4.2 \times 10^9$ |
| Maximum (kg)                            | $3.0 \times 10^{12}$ | $1.2 \times 10^{11}$                      | $1.1 \times 10^{12}$ | $8.6 \times 10^{11}$ | $2.9 \times 10^{11}$ | $2.0 \times 10^{10}$ | $5.8 \times 10^{11}$ | $8.2 \times 10^9$ |
| Minimum (SC-CO <sub>2</sub> , \$, USD)  | $9.1 \times 10^{10}$ | $2.2 \times 10^9$                         | $3.1 \times 10^{10}$ | $3.8 \times 10^{10}$ | $8.1 \times 10^9$    | $8.7 \times 10^8$    | $1.1 \times 10^{10}$ | $1.9 \times 10^8$ |
| Midpoint (SC-CO <sub>2</sub> , \$, USD) | $2.7 \times 10^{11}$ | $9.9 \times 10^9$                         | $9.8 \times 10^{10}$ | $8.3 \times 10^{10}$ | $2.6 \times 10^{10}$ | $2.0 \times 10^9$    | $4.7 \times 10^{10}$ | $7.1 \times 10^8$ |
| Maximum (SC-CO <sub>2</sub> , \$, USD)  | $5.1 \times 10^{11}$ | $1.9 \times 10^{10}$                      | $1.9 \times 10^{11}$ | $1.5 \times 10^{11}$ | $4.9 \times 10^{10}$ | $3.4 \times 10^9$    | $9.7 \times 10^{10}$ | $1.4 \times 10^9$ |
| <b>Soil inorganic carbon (SIC):</b>     |                      |                                           |                      |                      |                      |                      |                      |                   |
| Minimum (kg)                            | $2.1 \times 10^{11}$ | $1.4 \times 10^{10}$                      | $1.6 \times 10^{11}$ | $2.1 \times 10^9$    | $2.7 \times 10^{10}$ | $4.3 \times 10^9$    | $4.5 \times 10^9$    | 0.0               |
| Midpoint (kg)                           | $4.9 \times 10^{11}$ | $3.5 \times 10^{10}$                      | $3.3 \times 10^{11}$ | $8.5 \times 10^9$    | $8.9 \times 10^{10}$ | $1.0 \times 10^{10}$ | $1.4 \times 10^{10}$ | 0.0               |
| Maximum (kg)                            | $8.4 \times 10^{11}$ | $6.1 \times 10^{10}$                      | $5.5 \times 10^{11}$ | $1.8 \times 10^{10}$ | $1.7 \times 10^{11}$ | $1.7 \times 10^{10}$ | $2.5 \times 10^{10}$ | 0.0               |
| Minimum (SC-CO <sub>2</sub> , \$, USD)  | $3.6 \times 10^{10}$ | $2.3 \times 10^9$                         | $2.7 \times 10^{10}$ | $3.5 \times 10^8$    | $4.5 \times 10^9$    | $7.2 \times 10^8$    | $6.8 \times 10^8$    | 0.0               |
| Midpoint (SC-CO <sub>2</sub> , \$, USD) | $8.2 \times 10^{10}$ | $6.0 \times 10^9$                         | $5.6 \times 10^{10}$ | $1.4 \times 10^9$    | $1.5 \times 10^{10}$ | $1.7 \times 10^9$    | $2.3 \times 10^9$    | 0.0               |
| Maximum (SC-CO <sub>2</sub> , \$, USD)  | $1.4 \times 10^{11}$ | $1.0 \times 10^{10}$                      | $9.2 \times 10^{10}$ | $3.0 \times 10^9$    | $2.8 \times 10^{10}$ | $2.9 \times 10^9$    | $4.3 \times 10^9$    | 0.0               |
| <b>Total soil carbon (TSC):</b>         |                      |                                           |                      |                      |                      |                      |                      |                   |
| Minimum (kg)                            | $7.5 \times 10^{11}$ | $2.7 \times 10^{10}$                      | $3.5 \times 10^{11}$ | $2.3 \times 10^{11}$ | $7.4 \times 10^{10}$ | $9.4 \times 10^9$    | $7.0 \times 10^{10}$ | $1.1 \times 10^9$ |
| Midpoint (kg)                           | $2.1 \times 10^{12}$ | $9.4 \times 10^{10}$                      | $9.1 \times 10^{11}$ | $5.0 \times 10^{11}$ | $2.4 \times 10^{11}$ | $2.2 \times 10^{10}$ | $2.9 \times 10^{11}$ | $4.2 \times 10^9$ |
| Maximum (kg)                            | $3.8 \times 10^{12}$ | $1.8 \times 10^{11}$                      | $1.7 \times 10^{12}$ | $8.8 \times 10^{11}$ | $4.6 \times 10^{11}$ | $3.7 \times 10^{10}$ | $6.0 \times 10^{11}$ | $8.2 \times 10^9$ |
| Minimum (SC-CO <sub>2</sub> , \$, USD)  | $1.3 \times 10^{11}$ | $4.5 \times 10^9$                         | $5.8 \times 10^{10}$ | $3.8 \times 10^{10}$ | $1.3 \times 10^{10}$ | $1.6 \times 10^9$    | $1.2 \times 10^{10}$ | $1.9 \times 10^8$ |
| Midpoint (SC-CO <sub>2</sub> , \$, USD) | $3.5 \times 10^{11}$ | $1.6 \times 10^{10}$                      | $1.5 \times 10^{11}$ | $8.5 \times 10^{10}$ | $4.1 \times 10^{10}$ | $3.7 \times 10^9$    | $4.9 \times 10^{10}$ | $7.1 \times 10^8$ |
| Maximum (SC-CO <sub>2</sub> , \$, USD)  | $6.5 \times 10^{11}$ | $3.0 \times 10^{10}$                      | $2.8 \times 10^{11}$ | $1.5 \times 10^{11}$ | $7.7 \times 10^{10}$ | $6.2 \times 10^9$    | $1.0 \times 10^{11}$ | $1.4 \times 10^9$ |
